RESEARCH ARTICLE

# Area-Level Socioeconomic Gradients in Overweight and Obesity in a Community-Derived Cohort of Health Service Users – A Cross-Sectional Study

Andrew Bonney<sup>1,3</sup>, Darren J. Mayne<sup>2,3,4</sup>, Bryan D. Jones<sup>5</sup>, Lawrence Bott<sup>6</sup>, Stephen E. J. Andersen<sup>1,6</sup>, Peter Caputi<sup>7</sup>, Kathryn M. Weston<sup>1\*</sup>, Don C. Iverson<sup>8</sup>

**1** University of Wollongong, Graduate School of Medicine, Wollongong, New South Wales, 2522, Australia, **2** Public Health, Illawarra Shoalhaven Local Health District, Wollongong, New South Wales, 2500, Australia, **3** Illawarra Health and Medical Research Institute, University of Wollongong, New South Wales, 2522, Australia, **4** Sydney School of Public Health, The University of Sydney, Sydney, New South Wales, 2006, Australia, **5** Sonic Healthcare Ltd, North Ryde, New South Wales, 2113, Australia, **6** Southern.IML Pathology, Wollongong, New South Wales, 2500, Australia, **7** University of Wollongong, Centre for Health Initiatives, Wollongong, New South Wales, 2522, Australia, **8** Swinburne University of Technology, Faculty of Health, Arts and Design, Hawthorne, Victoria, 3122, Australia

\* [kathw@uow.edu.au](mailto:kathw@uow.edu.au)

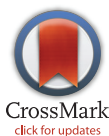

OPEN ACCESS

**Citation:** Bonney A, Mayne DJ, Jones BD, Bott L, Andersen SEJ, Caputi P, et al. (2015) Area-Level Socioeconomic Gradients in Overweight and Obesity in a Community-Derived Cohort of Health Service Users – A Cross-Sectional Study. *PLoS ONE* 10(8): e0137261. doi:10.1371/journal.pone.0137261

**Editor:** Harry Zhang, Old Dominion University, UNITED STATES

**Received:** March 17, 2015

**Accepted:** August 13, 2015

**Published:** August 28, 2015

**Copyright:** © 2015 Bonney et al. This is an open access article distributed under the terms of the [Creative Commons Attribution License](https://creativecommons.org/licenses/by/4.0/), which permits unrestricted use, distribution, and reproduction in any medium, provided the original author and source are credited.

**Data Availability Statement:** Access to the data described in this publication is approved by Southern.IML Pathology independently of the authors of the manuscript. Southern.IML Pathology Ltd is the owner of the data contained within this publication and the Illawarra Health and Medical Research Institute (IHMRI) is the custodian facilitating access to the data. This does not alter the authors' adherence to PLOS ONE policies on sharing data and materials; however, there are some restrictions on access to the SIMLR data set. A research cohort management committee, which includes a representative of

## Abstract

### Background

Overweight and obesity lead to higher probability of individuals accessing primary care but adiposity estimates are rarely available at regional levels to inform health service planning. This paper analyses a large, community-derived clinical database of objectively measured body mass index (BMI) to explore relationships with area-level socioeconomic disadvantage for informing regional level planning activities.

### Materials and Methods

The study included 91776 adults who had BMI objectively measured between 1 July 2009 and 30 June 2011 by a single pathology provider. Demographic data and BMI were extracted and matched to 2006 national census socioeconomic data using geocoding. Adjusted odds-ratios for overweight and obesity were calculated using sex-stratified logistic regression models with socioeconomic disadvantage of census collection district of residence as the independent variable.

### Results

The prevalence of overweight or obesity was 79.2% (males) and 65.8% (females); increased with age to 74 years; and was higher in rural (74%) versus urban areas (71.4%) ( $p < 0.001$ ). Increasing socioeconomic disadvantage was associated with increasing prevalence of overweight ( $p < 0.0001$ ), obesity ( $p < 0.0001$ ) and overweight or obesity ( $p < 0.0001$ ) in

Southern.IML Pathology, has independent oversight for project approval to access the data set. Data access applications and conditions of access are available at <http://ihmri.uow.edu.au/isprn/isprnpartnerprojects/index.html>. Applications to access the data should be addressed to SIMLR Cohort Management Committee, IHMRI, University of Wollongong, Wollongong, Australia 2522.

**Funding:** Three authors (BDJ, LB, SEJA) are affiliated with Sonic Healthcare or its subsidiary, Southern.IML Pathology. BDJ is Manager in information technology at Sonic Healthcare; LB is Chief Executive Officer at Southern.IML Pathology Ltd; SEJA is Consultant Pathologist at Southern.IML Pathology Ltd. The funding organisations, Sonic Healthcare and Southern.IML Pathology, provided support in the form of salaries for authors BDJ, LB and SEJA and access to the data, but did not have any additional role in the study design, data collection and analysis, decision to publish, or preparation of the manuscript. The specific roles of these authors are articulated in the 'author contributions' section.

**Competing Interests:** Three authors (BDJ, LB, SEJA) are affiliated with Sonic Healthcare or its subsidiary, Southern.IML Pathology. BDJ is Manager in information technology at Sonic Healthcare; LB is Chief Executive Officer at Southern.IML Pathology Ltd; SEJA is Consultant Pathologist at Southern.IML Pathology Ltd. Access to the data described in this publication is approved by Southern.IML Pathology independently of the authors of the manuscript.

women and obesity ( $p < 0.0001$ ) in men. Socioeconomic disadvantage was unrelated to overweight ( $p = 0.2024$ ) and overweight or obesity ( $p = 0.4896$ ) in males.

## Conclusion

It is feasible to link routinely-collected clinical data, representative of a discrete population, with geographic distribution of disadvantage, and to obtain meaningful area-level information useful for targeting interventions to improve population health. Our results demonstrate novel area-level socioeconomic gradients in overweight and obesity relevant to regional health service planning.

## Introduction

Australia has a major public health problem with overweight and obesity.[1] Using measured data, 63.4% of Australians were classified as overweight or obese in 2011–12.[2] Moreover, demonstrating entrenched community patterns, the proportion of Australians overweight or obese has increased from 56% in 1995.[2] An indication of the impact of these trends on the population's health was evidenced in a recent report that high body mass index (BMI) had overtaken tobacco as the leading independent contributor to the burden of disease in areas of Australia.[3]

With appreciation of the complex interaction of factors involved, there has been growing international interest in the social and geographic influences in the development of obesity.[4,5] Broadly reflecting the international literature,[6–8] the evidence from Australian research has indicated that, while individual-level socioeconomic assets such as education and income are associated with lower BMI,[9] and independently of area-level disadvantage in women,[10,11] indicators of area-level, or geographic, socioeconomic disadvantage have been shown to be significant correlates of high BMI in Australian adults.[12,13].

While the association between area-level socioeconomic disadvantage and BMI should be of interest to public health policy makers and practitioners,[12] it is also significant for health service planning. Overweight and obesity, with their attendant chronic metabolic, cardiovascular and cancer-related health complications,[14,15] lead to higher probability of individuals accessing primary care services.[16] These primary care services are inextricably linked by geography to the individuals and communities they serve.[17] Thus, awareness of local area socioeconomic disadvantage and associated obesity risk are critical to building local capacity in chronic disease management and prevention, and to influencing strategic approaches to provision of requisite community health services. However, in Australia, area-level planning for overweight and obesity is inhibited by a lack of information about its epidemiology within specific communities or regions. Population obesity rates in New South Wales (NSW), Australia, are monitored by the Continuous Health Survey which provides reliable estimates for NSW and its local health districts, but not for smaller geographic areas,[18] a situation that could be problematic as overweight and obesity patterns in small areas may differ from those in larger areas.[19]

A comprehensive approach to preventing overweight and obesity, and area-level management of its health risks, presents an urgent and complex task.[20] Clearly, integrating both public health and primary care efforts is required, an approach to improving population health which has recently been advocated.[21] The use of geographically-linked, routinely-collected area-level data from the region of interest may be very useful for this purpose.[22,23] These

data would have the advantages of being contemporaneous, cost-efficient and having sufficient population coverage to provide useful spatial resolution. However, despite the potential value of geographically-enabled clinical data for local health planning, its effective use by local health planners and clinical teams is hampered by lack of time, skills, financial resources and access to appropriate analytic mapping tools.[17]

Responding to these concerns, this paper describes the use of a large, longitudinal, community-derived clinical database to explore relationships between objectively-measured BMI and area-level socioeconomic disadvantage.

The specific objectives of this research were to:

1. Establish the feasibility of using a pre-existing clinical database for geographically-enabled analysis of BMI, and
2. Demonstrate the effectiveness of using a large community-derived database to investigate associations between BMI and area-level socioeconomic disadvantage in a sample of adult health service users in a discrete area of regional Australia, for use for health planning purposes.

## Materials and Methods

### Data sources and acquisition

This study was approved by the University of Wollongong and Illawarra Shoalhaven Local Health District (ISLHD) Health and Medical Human Research Ethics Committee (HE11/251).

Written informed consent was not given by participants for their clinical records to be used in this study; however, patient information was anonymized and de-identified prior to analysis, as follows. Data extraction and management were undertaken on-site at Southern.IML Pathology by one of the researchers who is also a senior staff member of Southern.IML (BDJ). Demographic (age, sex), anthropomorphic (BMI), pathology servicing (testing date) and location (residential address at testing) data were obtained from Southern.IML Pathology's clinical management and reporting database. A unique, project-specific identifier was assigned to the pathology records of each patient and two coded datasets were extracted. The first contained only the project identifier and residential address (street, locality, postal code, state) for each patient. Using Quicklocate 3 (G-NAF) software (MapData Services P/L, Greenwich, Australia), addresses were geocoded to assign longitude and latitude coordinates to identify individuals within the study area and assign small-area identifiers for matching to contextual variables from the 2006 Australian Census of Population and Housing.[24] Project identifiers for patients geocoded to the study area were then used to extract a second, coded analytic dataset containing only the project identifier, age, sex, year of testing, BMI, and longitude and latitude variables. As this dataset remained potentially re-identifiable through the latitude and longitude co-ordinates, it was stored on a secure network resource at Southern.IML Pathology, only accessed on-site, and analysed by researchers under the supervision of pathology company personnel. Exclusion criteria were pregnancy, resident outside the Illawarra-Shoalhaven local health district, having an address geocoded to commercial or Defence Force premises, or missing data on study variables. Out-of-area participants were excluded because the research ethics approval was limited to ISLHD residents aged  $\geq 18$  years only. [Fig 1](#) outlines the data acquisition process.

### Study area and sample

This study was undertaken in the Illawarra-Shoalhaven region of NSW, Australia, which comprises the Kiama, Shellharbour, Shoalhaven and Wollongong local government areas (LGAs),

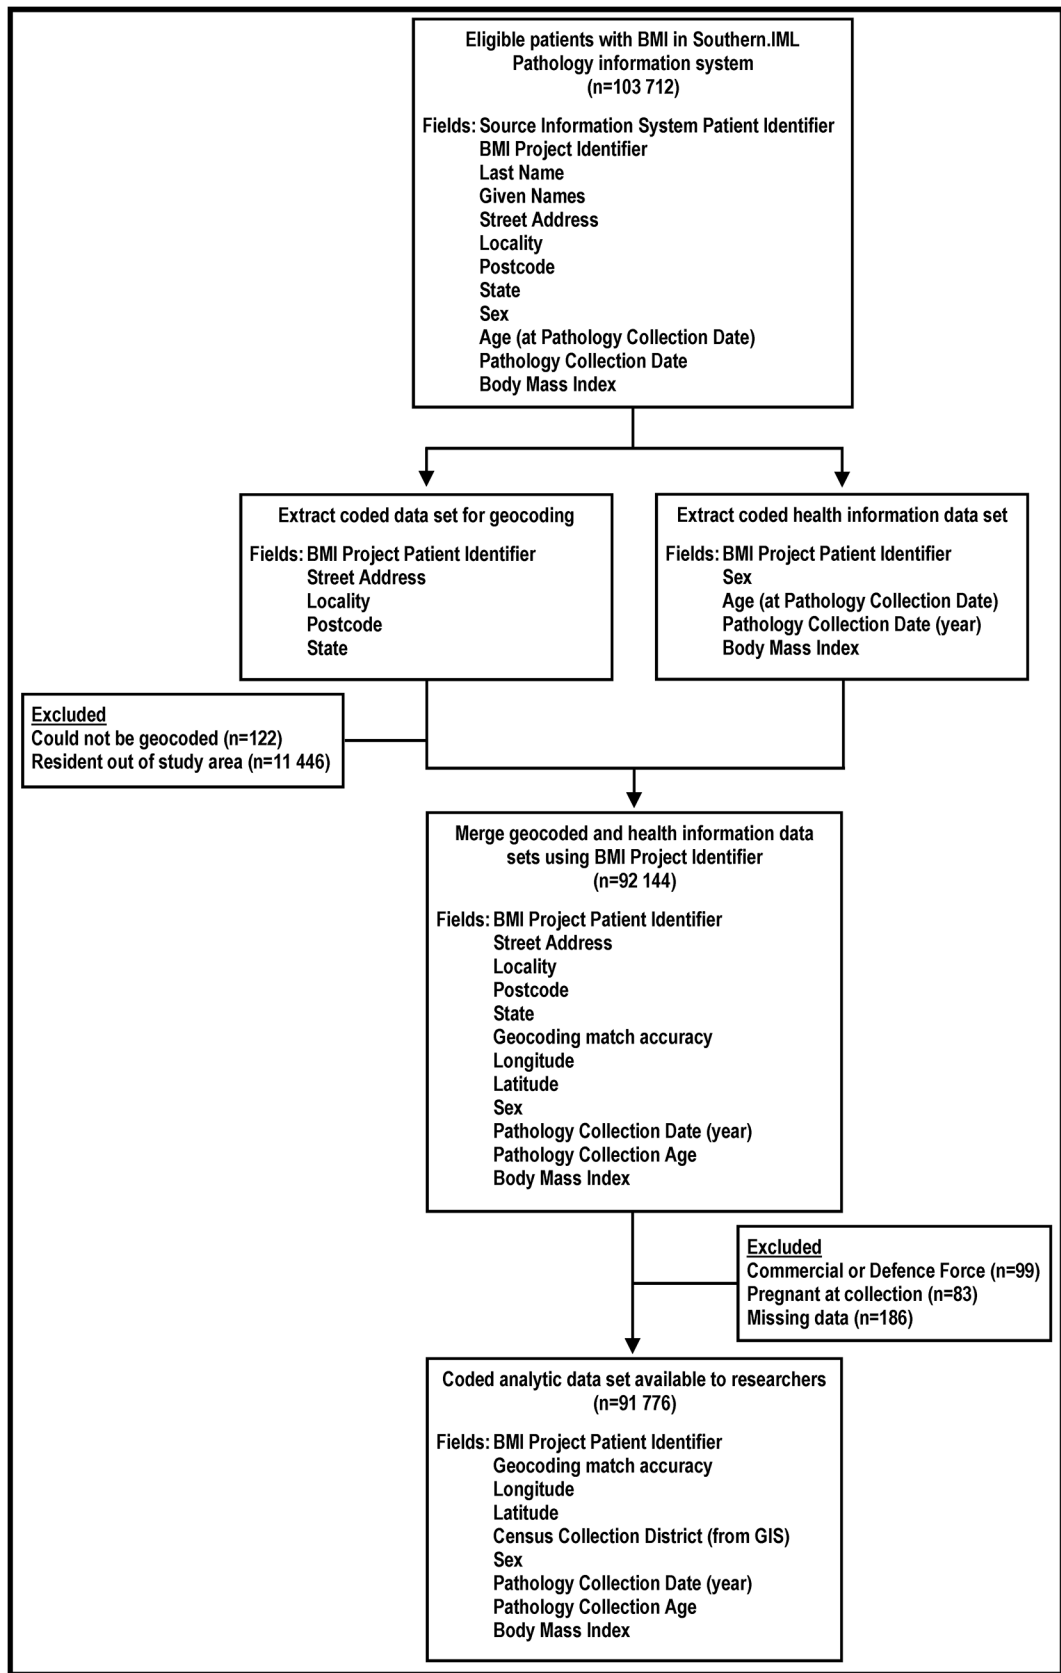

Fig 1. Data acquisition flow diagram.

doi:10.1371/journal.pone.0137261.g001

covers a land mass of 5615 square kilometres and had an estimated resident population of 389157 on 30 June 2010.[25] The study cohort included all residents of the study area aged 18 years and over who attended a Southern.IML Pathology collection centre between 1 July 2009 and 30 June 2011 and had their BMI objectively measured. Southern.IML Pathology is the largest provider of private pathology services in the study area and routinely collects BMI on patients being tested for glomerular filtration rate and liver function; cholesterol (lipids), triglycerides, high and low density lipoproteins; glucose and glucose tolerance; urea electrolytes and creatinine; and 24-hour urine analyses.

## Study design and variables

A cross-sectional, hierarchical design was used to account for clustering within 2006 Australian Census of Population and Housing Census Collection Districts (CCDs). CCDs were the smallest geographical units at which statistical outputs were produced for the 2006 census and were used to assign area-level socioeconomic and geographic variables to cohort members.[26] In 2006, the study area comprised 631 inhabited and conterminous CCDs with a median land area of 0.4 square kilometres, 196 dwellings and 524 residents. The median number of cohort members per CCD was 136 (inter-quartile range = 85–187). One CCD contained no cohort members, and a second CCD contained no female cohort members.

## Outcome variables

The primary outcome measure was objectively-measured BMI categorised according to World Health Organisation BMI classification[27]: underweight ( $<18.5\text{kg}/\text{m}^2$ ); normal weight ( $18.5$  to  $<25\text{kg}/\text{m}^2$ ); and overweight ( $25$  to  $<30\text{kg}/\text{m}^2$ ) or obese ( $\geq 30\text{kg}/\text{m}^2$ ). Height and weight were collected at time of presentation using a standard procedure. Weight was measured clothed with emptied pockets on medical scales calibrated to measure within 500grams. Height was measured barefoot using stadiometers. BMI was calculated in the pathology information system as per routine practice using the formula  $\text{mass}(\text{kg})/\text{height}(\text{metres})^2$ . Calculated BMIs for patients were included in the final analytic dataset, but not weights or heights. Analyses were limited to the most recent pathology episode for each patient in the study period to ensure their geocoded address and presentation address were spatially aligned.

## Study variable

The study variable was the 2006 CCD Index of Relative Socioeconomic Disadvantage (IRSD) quintile for a patient's residence at time of pathology visit. The IRSD is an aggregated scale with components of income, education, employment, family structure, disability, housing, transport and internet connection.[28] IRSD is scaled across Australia to have a mean of 1000 and standard deviation of 1000. Higher IRSD scores for CCDs indicate relative lower socioeconomic disadvantage compared to CCDs with lower IRSD scores.

## Co-variates

Analyses were adjusted for gender, age (18–24, 25–34, 35–44, 45–54, 55–64, 65–74,  $\geq 75$  years) and geographic area of residence. Geographic area of residence was assigned using 2006 Australian Standard Geographic Classification Remoteness Areas (RA), which classify localities based on road distance to five service centre types.[29] We categorised the Major Metropolitan (RA0) LGAs of Kiama, Shellharbour and Wollongong as “urban” and the Inner Regional (RA1) LGA of Shoalhaven as “rural”.

### Statistical analysis

Patients were assigned the IRSD quintile value [28] from the 2006 Australian Census of Population and Housing for the CCD [30] in which their geocoded address was located at the time of pathology collection. Prevalence rates for BMI categories were calculated by gender, age group, IRSD quintile and RA of residence (i.e. urban or rural). [29] Adjusted odds for being overweight (excluding obese), obese (excluding overweight), and overweight or obese were calculated relative to being under or normal weight using generalised estimating equations at the CCD level with logit link functions, exchangeable correlation structures and IRSD quintile as the independent variable. Within-cohort relative risks expressed as odds-ratios provide robust indications of the direction of exposure-outcome relationships which are generalisable to the target population, even in non-representative samples. [30,31] We tested for effect modification of the study variable by covariates for all study outcomes and refit stratified models in the presence of interaction to aid interpretation. Statistical significance was assessed using the likelihood ratio test and an alpha level of 0.05. Data management and analysis were performed using The SAS System 9.3s (SAS Institute Inc. Cary, NC, USA) and Esri ArcGIS for Desktop version 10 (Esri, Redlands, CA, USA).

### Results

Body mass index (BMI) data were available for 103712 unique individuals aged 18 years and over. One hundred and twenty-two (0.1%) could not be geocoded (geocoding rate:99.9%) and 11446 (11.0%) were geocoded to an address outside the study area. Of the remaining 92144 Illawarra-Shoalhaven residents, 99 (0.1%) were geocoded to commercial or Defence Force facilities, 83 (0.1%) were pregnant, and 186 (0.2%) had missing study data, leaving a final analytic dataset after their exclusion of 91776 unique individuals, of which 5.9%, 16.7%, 24.8% and 52.6% were geocoded to the Kiama, Shellharbour, Shoalhaven and Wollongong LGAs respectively. Table 1 shows geocoding accuracy rates by LGA for the residents included in the final analytic dataset.

The mean age of the cohort was 55.2 (SD = 15.66) years; 53.3% were female, and 24.8% lived in a RA1 area. Proportionally more cohort members (45%) were from less socioeconomically disadvantaged areas: quintile 1 (most disadvantaged):18.0%, quintile 2:18.5%, quintile 3 (middling disadvantage):18.5%, quintile 4:20.4%, quintile 5 (least disadvantaged):24.6%.

### Body Mass Index (BMI)

The mean BMI was 28.3kg/m<sup>2</sup> for males (SD = 6.4) and 28.7kg/m<sup>2</sup> for females (SD = 4.90). The distribution of body mass was significantly different for males compared with females

**Table 1. Geocoding accuracy rates for included Illawarra-Shoalhaven residents by local government area (LGA).**

| Accuracy level  | Kiama             | Shellharbour      | Shoalhaven        | Wollongong        | Total             |
|-----------------|-------------------|-------------------|-------------------|-------------------|-------------------|
|                 | n<br>(% accuracy) | n<br>(% accuracy) | n<br>(% accuracy) | n<br>(% accuracy) | n<br>(% accuracy) |
| <b>Address</b>  | 5066<br>(93.8%)   | 14406<br>(93.8%)  | 20713<br>(91.2%)  | 45982<br>(95.2%)  | 86167<br>(93.9%)  |
| <b>Street</b>   | 121<br>(2.2%)     | 368<br>(2.4%)     | 518<br>(2.3%)     | 648<br>(1.3%)     | 1655<br>(1.8%)    |
| <b>Locality</b> | 215<br>(4.0%)     | 583<br>(3.8%)     | 1 489<br>(6.6%)   | 1667<br>(3.5%)    | 3954<br>(4.3%)    |
| <b>Total</b>    | 5402              | 15357             | 22720             | 48297             | 91776             |

doi:10.1371/journal.pone.0137261.t001



( $p < 0.001$ ), across age groups ( $p < 0.001$ ), IRSD quintiles ( $p < 0.001$ ) and RA location ( $p < 0.001$ ). Overall, the prevalence of being overweight or obese was 79.2% (males) and 65.8% (females); increased with increasing age to 74 years; increased with increasing socioeconomic disadvantage; and was marginally higher in rural (74%) than urban areas (71.4%). The cohort prevalence of underweight, normal weight, overweight and obesity by sex, ten-year age groups, area-level socioeconomic disadvantage and residential area are shown in [Table 2](#).

### Socioeconomic disadvantage and BMI

[Table 3](#) shows unadjusted and adjusted estimates for overweight, obese, and overweight or obese models. In unadjusted analyses, increasing socioeconomic disadvantage of residential CCD was associated with increased odds of being overweight ( $p = 0.0002$ ), obese ( $p < 0.0001$ ), and overweight or obese ( $p < 0.0001$ ). However, there was very strong evidence of effect modification of BMI-IRSD associations in multivariable adjustment models ( $p < 0.0001$  for all interactions) consistent with stronger gradients for females compared to males (see [Table 3](#)).

[Table 4](#) reports sex-stratified odds-ratios of being overweight, obese, and overweight or obese for socioeconomic disadvantage of residential CCD adjusted for age and RA at pathology collection. Increasing socioeconomic disadvantage of residential CCD was associated with increasing prevalence of obesity in men ( $p < 0.0001$ ) but was unrelated to either overweight ( $p = 0.2024$ ) or overweight or obese ( $p = 0.4896$ ) body mass categories. The odds of obesity for men in the most socioeconomically disadvantaged quintile were increased by a factor of 1.37

**Table 2. Characteristics of sample (n = 91776) by body mass index (BMI) class.**

|                          | Total | Underweight |     | Normal weight |      | Overweight |      | Obese |      | Overweight or obese |      |
|--------------------------|-------|-------------|-----|---------------|------|------------|------|-------|------|---------------------|------|
|                          |       | n           | %   | n             | %    | n          | %    | n     | %    | n                   | %    |
| <b>Sex*</b>              |       |             |     |               |      |            |      |       |      |                     |      |
| Males                    | 42844 | 229         | 0.5 | 8695          | 20.3 | 19092      | 44.6 | 14828 | 34.6 | 33920               | 79.2 |
| Female                   | 48932 | 868         | 1.8 | 15846         | 32.4 | 15484      | 31.6 | 16734 | 34.2 | 32218               | 65.8 |
| <b>Age group*</b>        |       |             |     |               |      |            |      |       |      |                     |      |
| 18–24                    | 3796  | 219         | 5.8 | 2029          | 53.5 | 892        | 23.5 | 656   | 17.3 | 1548                | 40.8 |
| 25–34                    | 6942  | 175         | 2.5 | 2709          | 39.0 | 2204       | 31.7 | 1854  | 26.7 | 4058                | 58.5 |
| 35–44                    | 11693 | 126         | 1.1 | 3686          | 31.5 | 4089       | 35.0 | 3792  | 32.4 | 7881                | 67.4 |
| 45–54                    | 19097 | 163         | 0.9 | 5053          | 26.5 | 7121       | 37.3 | 6760  | 35.4 | 13881               | 72.7 |
| 55–64                    | 21917 | 141         | 0.6 | 4682          | 21.4 | 8571       | 39.1 | 8523  | 38.9 | 17094               | 78.0 |
| 65–74                    | 18608 | 145         | 0.8 | 3734          | 20.1 | 7626       | 41.0 | 7103  | 38.2 | 14729               | 79.2 |
| ≥75                      | 9723  | 128         | 1.3 | 2648          | 27.2 | 4073       | 41.9 | 2874  | 29.6 | 6947                | 71.4 |
| <b>IRSD<sup>a*</sup></b> |       |             |     |               |      |            |      |       |      |                     |      |
| 1 high                   | 1 547 | 217         | 1.3 | 3681          | 22.2 | 5901       | 35.7 | 6748  | 40.8 | 12649               | 76.4 |
| 2                        | 16993 | 233         | 1.4 | 4337          | 25.5 | 6159       | 36.2 | 6264  | 36.9 | 12423               | 73.1 |
| 3 middling               | 16982 | 204         | 1.2 | 4590          | 27.0 | 6435       | 37.9 | 5753  | 33.9 | 12188               | 71.8 |
| 4                        | 18672 | 202         | 1.1 | 5215          | 27.9 | 7265       | 38.9 | 5990  | 32.1 | 13255               | 71.0 |
| 5 low                    | 22582 | 241         | 1.1 | 6718          | 29.7 | 8816       | 39.0 | 6807  | 30.1 | 15623               | 69.2 |
| <b>Residential area*</b> |       |             |     |               |      |            |      |       |      |                     |      |
| Rural                    | 22720 | 264         | 1.2 | 5645          | 24.8 | 8721       | 38.4 | 8090  | 35.6 | 16811               | 74.0 |
| Urban                    | 69056 | 833         | 1.2 | 18896         | 27.4 | 25855      | 37.4 | 23472 | 34.0 | 49327               | 71.4 |

\*  $p < 0.001$

IRSD<sup>a</sup>, Index of Relative Socioeconomic Disadvantage

doi:10.1371/journal.pone.0137261.t002

**Table 3. Adjusted and unadjusted odds-ratios for overweight, obese, and overweight or obese body mass categories.**

|                            | Overweight (25.0–29.9 kg/m <sup>2</sup> ) |                  | Obese (≥30.0 kg/m <sup>2</sup> ) |                   | Overweight or obese (≥25.0 kg/m <sup>2</sup> ) |                  |
|----------------------------|-------------------------------------------|------------------|----------------------------------|-------------------|------------------------------------------------|------------------|
|                            | Unadjusted OR <sup>a</sup>                | Adjusted OR      | Unadjusted OR                    | Adjusted OR       | Unadjusted OR                                  | Adjusted OR      |
| IRSD <sup>b</sup> Quintile | p = 0.0002                                | p = 0.0002       | p<0.0001                         | p<0.0001          | p<0.0001                                       | p<0.0001         |
| 1 –high                    | 1.19 (1.10–1.27)                          | 0.79 (0.68–0.91) | 1.75 (1.59–1.91)                 | 1.31 (1.12–1.54)  | 1.43 (1.33–1.54)                               | 1.01 (0.88–1.15) |
| 2                          | 1.07 (1.00–1.15)                          | 0.82 (0.72–0.93) | 1.42 (1.29–1.56)                 | 1.21 (1.04–1.40)  | 1.22 (1.13–1.32)                               | 0.98 (0.88–1.15) |
| 3—middling                 | 1.06 (0.99–1.14)                          | 0.87 (0.76–1.00) | 1.23 (1.11–1.35)                 | 1.10 (0.93–1.30)  | 1.13 (1.05–1.22)                               | 0.97 (0.85–1.11) |
| 4                          | 1.07 (1.00–1.14)                          | 0.94 (0.82–1.06) | 1.13 (1.02–1.25)                 | 1.05 (0.90–1.23)  | 1.10 (1.02–1.19)                               | 0.99 (0.87–1.12) |
| 5 –low                     | 1.00                                      | 1.00             | 1.00                             | 1.00              | 1.00                                           | 1.00             |
| Sex                        | p<0.0001                                  | p<0.0001         | p<0.0001                         | p<0.0001          | p<0.0001                                       | p<0.0001         |
| Male                       | 1.00                                      | 1.00             | 1.00                             | 1.00              | 1.00                                           | 1.00             |
| Female                     | 0.43 (0.42–0.45)                          | 0.37 (0.34–0.40) | 0.61 (0.59–0.63)                 | 0.53 (0.49–0.57)  | 0.51 (0.49–0.53)                               | 0.43 (0.40–0.46) |
| Age group                  | p<0.0001                                  | p<0.0001         | p<0.0001                         | p<0.0001          | p<0.0001                                       | p<0.0001         |
| 18–24                      | 0.29 (0.27–0.32)                          | 0.25 (0.21–0.29) | 0.23 (0.21–0.26)                 | 0.23 (0.19–0.28)  | 0.26 (0.24–0.28)                               | 0.25 (0.22–0.28) |
| 25–34                      | 0.56 (0.52–0.60)                          | 0.52 (0.46–0.59) | 0.49 (0.46–0.53)                 | 0.48 (0.41–0.55)  | 0.52 (0.49–0.55)                               | 0.51 (0.45–0.56) |
| 35–44                      | 0.78 (0.74–0.83)                          | 0.77 (0.70–0.85) | 0.76 (0.72–0.81)                 | 0.72 (0.65–0.80)  | 0.77 (0.74–0.81)                               | 0.75 (0.69–0.82) |
| 45–54                      | 1.00                                      | 1.00             | 1.00                             | 1.00              | 1.00                                           | 1.00             |
| 55–64                      | 1.31 (1.24–1.37)                          | 1.18 (1.07–1.31) | 1.35 (1.29–0.81)                 | 1.26 (1.14–1.39)  | 1.33 (1.27–1.39)                               | 1.22 (1.12–1.33) |
| 65–74                      | 1.44 (1.36–1.52)                          | 1.21 (1.09–1.35) | 1.37 (1.30–1.45)                 | 1.30 (1.17–1.45)  | 1.41 (1.34–1.48)                               | 1.28 (1.16–1.41) |
| 75+                        | 1.08 (1.01–1.14)                          | 0.90 (0.78–1.03) | 0.79 (0.74–0.85)                 | 0.79 (0.66–0.94)  | 0.94 (0.88–0.99)                               | 0.88 (0.77–1.00) |
| Residential area           | p<0.0001                                  | p = 0.6766       | p = 0.0011                       | p = 0.2572        | p<0.0001                                       | p = 0.6819       |
| Metropolitan               | 1.00                                      | 1.00             | 1.00                             | 1.00              | 1.00                                           | 1.00             |
| Rural                      | 1.13 (1.07–1.18)                          | 1.11 (0.97–1.27) | 1.13 (1.05–1.21)                 | 1.17 (0.96–1.420) | 1.13 (1.07–1.20)                               | 1.17 (1.00–1.38) |
| Effect modification        |                                           |                  |                                  |                   |                                                |                  |
| IRSD *Sex                  |                                           | p<0.0001         |                                  | p<0.0001          |                                                | p<0.0001         |
| 1 –high (female)           |                                           | 1.57 (1.41–1.75) |                                  | 1.59 (1.42–1.78)  |                                                | 1.63 (1.48–1.80) |
| 2 (female)                 |                                           | 1.35 (1.21–1.50) |                                  | 1.24 (1.11–1.38)  |                                                | 1.31 (1.19–1.45) |
| 3 –middling (female)       |                                           | 1.22 (1.09–1.36) |                                  | 1.19 (1.06–1.33)  |                                                | 1.21 (1.09–1.35) |
| 4 (female)                 |                                           | 1.17 (1.05–1.30) |                                  | 1.12 (0.99–1.27)  |                                                | 1.15 (1.04–1.27) |
| 5 –low (female)            |                                           | 1.00             |                                  | 1.00              |                                                | 1.00             |
| IRSD *Age group            |                                           | p = 0.1691       |                                  | p = 0.3818        |                                                | p = 0.5027       |
| IRSD *Residential area     |                                           | p = 0.3181       |                                  | p = 0.1870        |                                                | p = 0.2055       |
| ICC <sup>c</sup>           | 0.008                                     | 0.008            | 0.025                            | 0.024             | 0.012                                          | 0.012            |

Adjusted odds ratios for relative socioeconomic disadvantage quintiles calculated using generalised estimating equations.

Intraclass correlation coefficients reported for unadjusted parameter estimates are for relative socioeconomic disadvantage (IRSD) models.

Obese individuals were excluded from overweight analyses and overweight individuals were excluded from obese analyses.

OR<sup>a</sup>, Odds Ratio

IRSD<sup>b</sup>, Index of Relative Socioeconomic Disadvantage

ICC<sup>c</sup>, Intra-cluster Correlation Coefficient

doi:10.1371/journal.pone.0137261.t003

(95% CI 1.22–1.55) compared to men in the least socioeconomically disadvantaged quintile. In contrast, increasing socioeconomic disadvantage of residential CCD for women was associated with increased prevalence of all study outcomes: overweight (p<0.0001), obesity (p<0.0001), and overweight or obesity (p<0.0001). Compared to women resident in the least disadvantaged CCDs, women living in the most disadvantaged CCDs had an odds-ratio for overweight of 1.37 (1.25–1.50), obesity of 2.06 (95% CI 1.84–2.30) and overweight or obesity of 1.71 (95% CI 1.56–1.87).



**Table 4. Adjusted socioeconomic disadvantage odds-ratios for overweight, obese, and overweight or obese body mass categories by sex.**

| IRSD <sup>a</sup> quintile | Overweight (25.0–29.9 kg/m <sup>2</sup> ) |       |      |                          | Obese (≥30.0 kg/m <sup>2</sup> ) |       |      |                  | Overweight or obese (≥25.0 kg/m <sup>2</sup> ) |       |      |                  |  |  |  |
|----------------------------|-------------------------------------------|-------|------|--------------------------|----------------------------------|-------|------|------------------|------------------------------------------------|-------|------|------------------|--|--|--|
|                            | n <sup>b</sup>                            | Total | %    | Adjusted OR <sup>c</sup> | N                                | Total | %    | Adjusted OR      | N                                              | Total | %    | Adjusted OR      |  |  |  |
| Males                      |                                           |       |      | p = 0.2024               |                                  |       |      | p < 0.0001       |                                                |       |      | p = 0.4896       |  |  |  |
| 1—high                     | 3136                                      | 4657  | 67.3 | 0.93 (0.84–1.02)         | 2997                             | 4518  | 66.3 | 1.37 (1.22–1.55) | 6133                                           | 7654  | 80.1 | 1.11 (1.01–1.23) |  |  |  |
| 2                          | 3359                                      | 5020  | 66.9 | 0.90 (0.82–0.99)         | 2982                             | 4643  | 64.2 | 1.28 (1.14–1.43) | 6341                                           | 8002  | 79.2 | 1.05 (0.96–1.16) |  |  |  |
| 3—middling                 | 3530                                      | 5179  | 68.2 | 0.96 (0.88–1.06)         | 2676                             | 4325  | 61.9 | 1.14 (1.01–1.28) | 6206                                           | 7855  | 79.0 | 1.03 (0.93–1.14) |  |  |  |
| 4                          | 4030                                      | 5886  | 68.5 | 0.97 (0.89–1.06)         | 2869                             | 4725  | 60.7 | 1.05 (0.93–1.19) | 6899                                           | 8755  | 78.8 | 1.01 (0.92–1.11) |  |  |  |
| 5—low                      | 5037                                      | 7274  | 69.2 | Referent                 | 3304                             | 5541  | 59.6 | Referent         | 8341                                           | 10578 | 78.9 | Referent         |  |  |  |
| ICC <sup>d</sup>           | 0.008                                     |       |      |                          | 0.027                            |       |      |                  | 0.010                                          |       |      |                  |  |  |  |
| Females                    |                                           |       |      | p < 0.0001               |                                  |       |      | p < 0.0001       |                                                |       |      | p < 0.0001       |  |  |  |
| 1—high                     | 2765                                      | 5142  | 53.8 | 1.37 (1.25–1.50)         | 3751                             | 6128  | 61.2 | 2.06 (1.84–2.30) | 6516                                           | 8893  | 73.3 | 1.71 (1.56–1.87) |  |  |  |
| 2                          | 2800                                      | 5709  | 49.0 | 1.16 (1.06–1.27)         | 3282                             | 6191  | 53.0 | 1.50 (1.35–1.68) | 6082                                           | 8991  | 67.6 | 1.32 (1.20–1.45) |  |  |  |
| 3—middling                 | 2905                                      | 6050  | 48.0 | 1.15 (1.05–1.25)         | 3077                             | 6222  | 49.5 | 1.33 (1.19–1.48) | 5982                                           | 9127  | 65.5 | 1.23 (1.12–1.34) |  |  |  |
| 4                          | 3235                                      | 6796  | 47.6 | 1.11 (1.01–1.21)         | 3121                             | 6682  | 46.7 | 1.17 (1.04–1.32) | 6356                                           | 9917  | 64.1 | 1.14 (1.03–1.25) |  |  |  |
| 5—low                      | 3779                                      | 8501  | 44.5 | Referent                 | 3503                             | 8225  | 42.6 | Referent         | 7282                                           | 12004 | 60.7 | Referent         |  |  |  |
| ICC                        | 0.010                                     |       |      |                          | 0.026                            |       |      |                  |                                                |       |      |                  |  |  |  |

IRSD<sup>a</sup>, Index of Relative Socioeconomic Disadvantage

n<sup>b</sup>, number with outcome in quintile; Total, total number in quintile; %, percent of quintile with outcome

OR<sup>c</sup>, Odds Ratio

ICC<sup>d</sup>, Intra-cluster Correlation Coefficient

Odds ratios for relative socioeconomic disadvantage quintiles calculated using sex-stratified generalised estimating equations adjusted for age and residential location at pathology collection.

Obese individuals were excluded from overweight analyses and overweight individuals were excluded from obese analyses.

doi:10.1371/journal.pone.0137261.t004

Intra-cluster Correlation Coefficients (ICC) for multivariable models are reported in Tables 3 and 4 and averaged 0.9% for overweight, 2.6% for obesity and 1.2% for overweight and obesity, which were consistent with ICC estimates for weight-related physical measures in comparable primary health care settings.[32]

## Discussion

This study demonstrates it is feasible to link routinely-collected clinical data with geographic distribution of disadvantage. Tools to visualize IRSD in Australia across a variety of geographical statistical areas are publicly available and do not require specialised statistical skills.[33] Using such tools, meaningful information can be obtained to allow health service planners to anticipate and respond to demand for services geographically, as well as target preventive services and health promotion activities.[34]

We have described differing area-level socioeconomic gradients for overweight and obesity when these are considered as separate categories for men and women. The gradient was consistent for women across both categories of elevated BMI, but only present for obesity for men. We also observed a socioeconomic gradient when overweight and obese categories of BMI were combined for women but not for men due to the lack of a socioeconomic gradient for overweight in men. We are not aware of any previous reports of this observation using area-level socioeconomic indices in Australia. Using household income as the area-level socioeconomic indicator, King et al (2006) observed a graded increase in mean BMI from least to most disadvantaged areas for both sexes,[12] but did not analyse the data by BMI category. Analysing data from 16243 participants in the 2001 National Health Survey, Brown and Siahpush

(2008) found that increasing area-level disadvantage measured by IRSD was associated with increased risk of overweight and obese BMI in females but not males.[13] It is possible our results reflect a change in the pattern of weight gain in the population in the decade since that study. Recent reports have indicated a slowing of weight gain across the population other than for older men and for those in areas of most socioeconomic disadvantage,[35] which may partly explain the socioeconomic gradients encountered in our findings. Brennan et al (2010) observed an increased risk of obesity in men resident in CCDs in the lower quintile of socioeconomic status as measured by the IRSD.[36] However, their analyses did not extend to comparisons of risk of overweight and obesity.[36] It is of interest to compare our findings with a recent Australian representative population study,[37] which demonstrated opposing socioeconomic gradients for overweight and obesity in men using total annual household income as an individual-level socioeconomic marker. Whereas these authors did not find a socioeconomic gradient for risk of overweight in women,[37] our data did indicate a gradient. The differences in our findings may be due to our larger sample size allowing detection of a gradient in women, or our choice of using an area-level socioeconomic indicator which included education along with income and other factors. Lower education attainment has been previously described as being associated with increased BMI in Australian men and women.[13] The inclusion of education as a factor may possibly explain the difference in our results from those using income alone; flattening the gradient produced by the association between higher income and overweight in men and producing a gradient in the association of area-level disadvantage and overweight in women. Systematic reviews have outlined a consistent pattern of inverse relationship between BMI and socioeconomic status in women in developed countries and less consistent socioeconomic gradients for men.[6–8] Our findings of differing gradients in overweight and obesity, along with results of others,[37] contribute to the observations of the inconsistent patterning observed for men and add to evidence that it is potentially misleading to aggregate overweight and obese BMI categories in socioeconomically-linked analyses.[37]

## Implications of the findings

The practical implication of these findings is their application for health planners with access to locally-derived data. Our data indicate, not unexpectedly, that for both men and women in the Illawarra-Shoalhaven region, the prevalence of obesity is higher in neighbourhoods of greatest disadvantage. However, for adult male health service users, the prevalence of overweight is similar in neighbourhoods of high and low disadvantage. Estimates of the relative risk or prevalence of overweight or obesity for health service users at a neighbourhood (i.e. CCD) level can inform targeted strategies towards prevention of illness, or management, individualised to localities, and addressing context-specific cultural and community factors.[1] For example, in neighbourhoods with high disadvantage, a combined approach of building capacity in obesity-related chronic disease management within community health services, integrated with nutrition education [38] and community-level activities to improve fresh food availability and the physical activity environment, may represent effective prioritisation of resources.[1,10] As men may be less likely to seek preventive health services,[39] a settings approach to weight management in workplaces[1] and increased awareness of the need to address BMI in opportunistic preventive health checks may more effectively target men and be more appropriate for health services in neighbourhoods with least disadvantage. Previous research has described how involving local health workers in interpreting geographically presented health data provided valuable insights into the data while engendering significant enthusiasm for a community-oriented health care approach.[17] Thus, there is significant scope for the use of geographically-enabled data to engage local primary health care services in the improvement of

area-level population health. Further research including spatial clustering of BMI and associated health risks, relationships with proximity to community health services, and temporal changes, would significantly support population health efforts in discrete communities or regions.

## Limitations

These findings should be interpreted within the study limitations. The cross-sectional nature of the analyses does not facilitate attribution of causal relationships. The use of area-level indices alone did not permit control for individual-level attributes. Our study sample was derived from persons already using the health system and being referred for pathology testing, and is likely biased with a higher proportion of persons in ill-health and hence, a higher prevalence of health risk factors. This assumption appears validated by the higher prevalence of overweight or obesity in our sample compared with population estimates. The Australian Health Survey reported the prevalence of measured overweight or obesity as 70.3% (men) and 56.2% (women); compared with 79.2% and 65.8% respectively in our sample.[2] Hence, it is not appropriate to use our sample for estimating population point prevalence estimates.

## Conclusions

Routinely collected clinical data can inform community and regional health planning to combat overweight and obesity and their health complications. Knowledge of differential trends in overweight and obesity in association with area-level socioeconomic disadvantage will help to tailor and target interventions to assist in optimising the impact of health expenditure in improving population health.

## Acknowledgments

The authors would like to thank Southern.IML Pathology for the generous access to their data, personnel and infrastructure which enabled this study to be undertaken.

## Author Contributions

Conceived and designed the experiments: AB SEJA DJM. Performed the experiments: DJM BDJ. Analyzed the data: DJM. Wrote the paper: AB DJM KMW. Geocoding of data set: DJM BDJ. Wrote the first draft of the manuscript and revised the manuscript following review: AB DJM KMW. Contributed to the study design interpreting results and writing final draft of manuscript: AB DJM BDJ LB SEJA PC KMW DCI.

## References

1. Gill T, King L, Bauman A, Vita P, Caterson I, Colagiuri S, et al. A “state of the knowledge” assessment of comprehensive interventions that address the drivers of obesity. A Rapid Assessment prepared for the National Health and Medical Research Council (NHMRC). Sydney: University of Sydney, 2010.
2. Australian Bureau of Statistics. Australian Health Survey: First Results, 2011–12. Canberra: Commonwealth of Australia, 2012.
3. Hoad V, Somerford P, Katzenellenbogen J. High body mass index overtakes tobacco as the leading independent risk factor contributing to disease burden in Western Australia. *Aust N Z J Public Health* 2010; 34(2):214–5. doi: [10.1111/j.1753-6405.2010.00509.x](https://doi.org/10.1111/j.1753-6405.2010.00509.x) PMID: [23331368](https://pubmed.ncbi.nlm.nih.gov/23331368/)
4. Mobley LR, Finkelstein EA, Khavjou OA, Will JC. Spatial analysis of body mass index and smoking behavior among WISEWOMAN participants. *J Womens Health (Larchmt)* 2004; 13(5):519–28.
5. Keegan THM, Hurley S, Goldberg D, Nelson DO, Reynolds P, Bernstein L et al. The association between neighborhood characteristics and body size and physical activity in the California teachers study cohort. *Am J Public Health* 2012; 102(4):689–97. doi: [10.2105/AJPH.2011.300150](https://doi.org/10.2105/AJPH.2011.300150) PMID: [21852626](https://pubmed.ncbi.nlm.nih.gov/21852626/)

6. Ball K, Crawford D. Socioeconomic status and weight change in adults: a review. *Soc Sci Med* 2005; 60(9):1987–2010. PMID: [15743649](#)
7. McLaren L. Socioeconomic status and obesity. *Epidemiol Rev* 2007; 29:29–48. PMID: [17478442](#)
8. El-Sayed AM, Scarborough P, Galea S. Unevenly distributed: A systematic review of the health literature about socioeconomic inequalities in adult obesity in the United Kingdom. *BMC Public Health* 2012; 12(1).
9. Kifle T, Desta I. The relationship between body mass index and socioeconomic and demographic indicators: evidence from Australia. *Int J Public Health* 2012; 57(1):135–42. doi: [10.1007/s00038-011-0288-y](#) PMID: [21858459](#)
10. Ball K, Abbott G, Cleland V, Timperio A, Thornton L, Mishra G et al. Resilience to obesity among socioeconomically disadvantaged women: The READI study. *Int J Obes (Lond)* 2012; 36(6):855–65.
11. Williams LK, Andrianopoulos N, Cleland V, Crawford D, Ball K. Associations Between Education and Personal Income With Body Mass Index Among Australian Women Residing in Disadvantaged Neighborhoods. *Am J Health Promot* 2013; 28(1):59–65. doi: [10.4278/ajhp.120316-QUAN-143](#) PMID: [23458372](#)
12. King T, Kavanagh AM, Jolley D, Turrell G, Crawford D. Weight and place: A multilevel cross-sectional survey of area-level social disadvantage and overweight/obesity in Australia. *Int J Obes (Lond)* 2006; 30(2):281–87.
13. Brown A, Siahpush M. Risk factors for overweight and obesity: results from the 2001 National Health Survey. *Public Health* 2007; 121(8):603–13. PMID: [17570451](#)
14. Kopelman P. Health risks associated with overweight and obesity. *Obes Rev* 2007; 8(Suppl1):13–7.
15. Guh DP, Zhang W, Bansback N, Amarsi Z, Birmingham CL, Anis AH. The incidence of co-morbidities related to obesity and overweight: A systematic review and meta-analysis. *BMC Public Health* 2009; 9.
16. Doherty E, Dee A, Ciaran O. Estimating the amount of overweight and obesity related health-care use in the Republic of Ireland using SLÁN data. *Econ Soc Rev (Irel)* 2012; 43(2):227–50.
17. Bazemore A, Phillips RL, Miyoshi T. Harnessing Geographic Information Systems (GIS) to Enable Community-Oriented Primary Care. *J Am Board Fam Med* 2010; 23(1):22–31. doi: [10.3122/jabfm.2010.01.090097](#) PMID: [20051539](#)
18. Barr M, Baker D, Goringe M, Fritsche L. NSW Population Health Survey: description of methods. Sydney, NSW: New South Wales Health Survey Program, Centre for Epidemiology and Research, NSW Department of Health, 2008:2.
19. Drewnowski A, Rehm CD, Solet D. Disparities in obesity rates: analysis by ZIP code area. *Soc Sci Med* 2007; 65(12):2458–63. PMID: [17761378](#)
20. WHO. Global status report on noncommunicable diseases 2010. In: Alwan A, editor. Geneva: WHO, 2011.
21. IOM. Primary Care and Public Health: Exploring Integration to Improve Population Health. Washington: The National Academies of Sciences, Institute of Medicine, 2012.
22. Roth C, Shivade CP, Foraker RE, Embi PJ. Integrating population- and patient-level data for secondary use of electronic health records to study overweight and obesity. *Stud Health Technol Inform* 2013; 192:1100. PMID: [23920874](#)
23. Roth C, Foraker RE, Payne PRO, Embi PJ. Community-level determinants of obesity: Harnessing the power of electronic health records for retrospective data analysis. *BMC Med Inform Decis Mak* 2014; 14(1).
24. Australian Bureau of Statistics. 2006 Census data. Canberra, 2014.
25. Australian Bureau of Statistics. Population by Age and Sex, Regions of Australia. Canberra: Commonwealth of Australia, 2011.
26. Australian Bureau of Statistics. Census Dictionary, 2006 (Reissue): Collection District (CD). Canberra: Australian Bureau of Statistics, 2011.
27. WHO. BMI Classification. Global Database on Body Mass Index: World Health Organisation, 2014.
28. Australian Bureau of Statistics. Index of Relative Socioeconomic Disadvantage. Canberra: Australian Bureau of Statistics, 2013.
29. Australian Bureau of Statistics. Remoteness structure. Canberra: Australian Bureau of Statistics, 2014.
30. Mealing N, Banks E, Jorm L, Steele DG, Clements MS, Rogers KD. Investigation of relative risk estimates from studies of the same population with contrasting response rates and designs. *BMC Med Res Methodol* 2010; 10(1):26.

31. Criqui MH. Response bias and risk ratios in epidemiologic studies. *Am J Epidemiol* 1979; 109(4):394–9. PMID: [443238](#)
32. Littenberg B, MacLean CD. Intra-cluster correlation coefficients in adults with diabetes in primary care practices: The Vermont Diabetes Information System field survey. *BMC Med Res Methodol* 2006; 6:20. PMID: [16672056](#)
33. Australian Bureau of Statistics. Mapping SEIFA. Canberra: Australian Bureau of Statistics, 2013.
34. Butler DC, Petterson S, Bazemore A, Douglas KA. Use of measures of socioeconomic deprivation in planning primary health care workforce and defining health care need in Australia. *Aust J Rural Health* 2010; 18(5):199–204. doi: [10.1111/j.1440-1584.2010.01154.x](#) PMID: [21040081](#)
35. Peeters A, Magliano DJ, Backholer K, Zimmet P, Shaw JE. Changes in the rates of weight and waist circumference gain in Australian adults over time: a longitudinal cohort study. *BMJ Open* 2014; 4(1).
36. Brennan SL, Henry MJ, Nicholson GC, Kotowicz MA, Pasco JA. Socioeconomic status, obesity and lifestyle in men: The Geelong Osteoporosis Study. *J Mens Health* 2010; 7(1):31–41.
37. Markwick A, Vaughan L, Ansari Z. Opposing socioeconomic gradients in overweight and obese adults. *Aust N Z J Public Health* 2013; 37(1):32–38. doi: [10.1111/1753-6405.12007](#) PMID: [23379803](#)
38. Rajgopal R, Cox RH, Lambur M, Lewis EC. Cost-benefit analysis indicates the positive economic benefits of the Expanded Food and Nutrition Education Program related to chronic disease prevention. *J Nutr Educ Behav* 2002; 34(1):26–37. PMID: [11917669](#)
39. Springer KW, Mouzon DM. “Macho Men” and Preventive Health Care: Implications for Older Men in Different Social Classes. *J Health Soc Behav* 2011; 52(2):212–27. doi: [10.1177/0022146510393972](#) PMID: [21490311](#)
